***TITLE: Penetrance of polygenic obesity susceptibility loci across the body mass index distribution: an update on scaling effects.***

***SHORT TITLE: Obesity SNPs across the BMI distribution***

***AUTHORS:*** Arkan Abadi,<sup>1,9</sup> Akram Alyass,<sup>1,9</sup> Sebastien Robiou du Pont,<sup>1</sup> Ben Bolker,<sup>2</sup> Pardeep Singh,<sup>3</sup> Viswanathan Mohan,<sup>4</sup> Rafael Diaz,<sup>5</sup> James C. Engert,<sup>6</sup> Hertz C. Gerstein,<sup>1,7,8</sup> Sonia S. Anand,<sup>1,7,8</sup> David Meyre,<sup>1,3,\*</sup>

***AUTHOR AFFILIATIONS:***

<sup>1</sup>Department of Health Research Methods, Evidence, and Impact, McMaster University, Hamilton, ON L8S 4L8 Canada; <sup>2</sup>Department of Mathematics and Statistics, McMaster University, Hamilton, ON L8S 4L8 Canada; <sup>3</sup>Department of Pathology and Molecular Medicine, McMaster University, Hamilton, ON L8S 4L8 Canada; <sup>4</sup>Madras Diabetes Research Foundation, Chennai, India; <sup>5</sup>ECLA-Academic Research Organization, Rosario, Argentina; <sup>6</sup>McGill University, Montreal, QC H3A 0G4 Canada; <sup>7</sup>Population Health Research Institute, McMaster University and Hamilton Health Sciences, Hamilton General Hospital, Hamilton, ON L8S 4L8 Canada; <sup>8</sup>Department of Medicine, McMaster University, Hamilton, ON L8S 4L8 Canada

<sup>9</sup>These authors contributed equally to this work

\*Correspondence: [meyred@mcmaster.ca](mailto:meyred@mcmaster.ca) (D.M.)

## **ABSTRACT:**

A growing number of single nucleotide polymorphisms (SNPs) have been associated with body mass index (BMI) and obesity, but whether the effect of these obesity susceptibility loci is uniform across the BMI distribution remains unclear. We studied the effects of 37 BMI/obesity-associated SNPs in 75,230 adults of European ancestry along BMI percentiles using conditional quantile regression (CQR) and meta-regression (MR) models. The effects of 9 SNPs (24%) increased significantly across the sample BMI distribution including, *FTO* (rs1421085,  $p=8.69 \times 10^{-15}$ ), *PCSK1* (rs6235,  $p=7.11 \times 10^{-06}$ ), *TCF7L2* (rs7903146,  $p=9.60 \times 10^{-06}$ ), *MC4R* (rs11873305,  $p=5.08 \times 10^{-05}$ ), *FANCL* (rs12617233,  $p=5.30 \times 10^{-05}$ ), *GIPR* (rs11672660,  $p=1.64 \times 10^{-04}$ ), *MAP2K5* (rs997295,  $p=3.25 \times 10^{-04}$ ), *FTO* (rs6499653,  $p=6.23 \times 10^{-04}$ ) and *NT5C2* (rs3824755,  $p=7.90 \times 10^{-04}$ ). We showed that such increases stem from unadjusted gene interactions that enhanced the effects of SNPs in persons with high BMI. When 125 height-associated were analyzed for comparison, only one (<1%), *IGF1* (rs6219,  $p=1.80 \times 10^{-04}$ ), showed effects that varied significantly across height percentiles. Cumulative gene scores of these SNPs (GS-BMI and GS-Height, respectively) showed that only GS-BMI had effects that increased significantly across the sample distribution (BMI:  $p=7.03 \times 10^{-37}$ , Height:  $p=0.499$ ). Overall, these findings underscore the importance of gene-gene and gene-environment interactions in shaping the genetic architecture of BMI and advance a method to detect such interactions using only the sample outcome distribution.

**Abadi, A, et al.** Penetrance of polygenic obesity susceptibility loci across the body mass index distribution: an update on scaling effects.

**1 INTRODUCTION:**

2 Obesity is a prominent risk factor for psychological disorders,  
3 osteoarthritis, hypertension, type 2 diabetes (T2D), cardiovascular disease, and  
4 certain cancers.<sup>1,2</sup> The rise of obesity coincided with ‘obesogenic’ societal and  
5 environmental changes that include excessive consumption of high calorie foods,  
6 sedentary lifestyle and urbanization.<sup>2-4</sup> Genetic factors are also known to play an  
7 important role in obesity as 50-80% of body mass index (BMI) variation can be  
8 ascribed to genetics (heritability).<sup>5,6</sup> Moreover, genome wide association studies  
9 (GWAS) have identified ~140 polygenic loci that are directly associated with BMI  
10 or obesity.<sup>7</sup>

11 The role of individual and compound gene-environment (GXE) and gene-  
12 gene (GXG) interactions in determining BMI has not been fully elucidated. The  
13 study of BMI-associated GXG interactions has been impeded by statistical and  
14 computational limitations, although promising new approaches have recently  
15 been proposed.<sup>8-10</sup> On the other hand, several lines of evidence suggest that  
16 GXE interactions may play an important role in shaping BMI. First, estimates of  
17 the heritability of BMI are influenced by environmental exposures.<sup>11</sup> One study  
18 reported that the heritability of BMI is increased in persons born after the  
19 obesogenic transition, while another reported that the heritability of BMI is  
20 correlated with the population prevalence of obesity.<sup>12,13</sup> More recently, the  
21 cumulative gene score from 29 BMI-associated SNPs showed a positive  
22 interaction effect with birth year.<sup>14</sup> Interactions between the genetic determinants  
23 of BMI and obesogenic environmental factors readily explains why both

**Abadi, A, et al.** Penetrance of polygenic obesity susceptibility loci across the body mass index distribution: an update on scaling effects.

estimates of BMI heritability and cumulative SNP effects are enhanced in permissive environments. Second, specific interactions between BMI-associated SNPs and environmental factors have been documented.<sup>11</sup> Physical activity and energy intake have been reported to modify the effects of SNPs within the fat mass and obesity-associated (*FTO*) gene.<sup>15-19</sup> Importantly, *FTO* (rs1421085) has been shown to jointly interact with diet, physical activity, salt and alcohol consumption and sleep duration.<sup>20</sup> Thus, a subset of genetic variants may affect BMI through a mixture of direct effects and compound interactions. As such, investigating individual environmental factors may not capture the full range of environmental modification for a given SNP.<sup>21,22</sup>

In this report, we advanced a statistical framework to assess the effects of single and mixed GXE and GXG interactions on the association between SNPs and BMI. Specifically, conditional quantile regression (CQR) was applied to investigate the effects of 37 BMI/obesity-associated SNPs at multiple percentiles of the sample BMI distribution in 75,230 adults of European ancestry (EA).<sup>23,24</sup> Variability in SNP effects across these BMI percentiles was demonstrated to result from unadjusted interactions and was modeled using meta-regression (MR).<sup>25,26</sup> In this way, CQR and MR were used to collect evidence of unadjusted interactions directly from the sample distribution of BMI absent measures of specific environmental factors. A secondary analysis on 125 established height-associated SNPs is also included for comparison.

**Abadi, A, et al.** Penetrance of polygenic obesity susceptibility loci across the body mass index distribution: an update on scaling effects.

1 **SUBJECTS AND METHODS:**

2 **Participants and Phenotypes:** The sample population included  
3 participants from the following studies: ARIC (phs000280.v3.p1), CARDIA  
4 (phs000285.v3.p2), CHS (phs000287.v6.p1), EpiDREAM, the Framingham  
5 cohort (phs000007.v29.p10), MESA (phs000209.v13.p3), COPD  
6 (phs000179.v5.p2), eMERGE II (phs000888.v1.p1) and the WHI  
7 (phs000200.v10.p3). Measurements collected from participants below age 18 or  
8 above the age of 92 were excluded (<1%). For studies with repeated measures  
9 across multiple time points or visits, the median height and the median weight  
10 was extracted along with the corresponding age at these median values. BMI  
11 was calculated by dividing the median weight (kg) by the square of the average  
12 measures of height (m). Diabetic status was indicated by one of the following  
13 criteria: (1) physician report or self-report of physician-diagnosis, (2) report taking  
14 diabetes medication, (3) fasting plasma glucose  $\geq 126$  mg/dL (7mM), or (4) 2hr  
15 glucose  $\geq 200$  mg/dl (11mM) during an oral glucose tolerance test (OGTT).<sup>27</sup>  
16 Obesity categories including, normal weight (NW), overweight (OW), as well as  
17 obesity classes I, II and III (Ob-I, Ob-II, and Ob-III, respectively) were specified  
18 according to WHO guidelines.<sup>28</sup> Analyses were restricted to participants of  
19 European ancestry (EA, self-reported) with a combined sample size of N=75,230.  
20 Summary statistics are presented Table S1. This project was approved by local  
21 ethics committee (Hamilton Integrated Research Ethics Board-HiREB) and  
22 participant-level data access was granted through the database of Genotypes  
23 and Phenotypes (dbGaP) following approval by study-specific Data Access

**Abadi, A, et al.** Penetrance of polygenic obesity susceptibility loci across the body mass index distribution: an update on scaling effects.

1 Committee (DAC). All analyses are consistent with study-specific Data Use  
2 Certifications (DUC).

3 **Sample Quality Control (QC):** Detailed genotyping procedures for  
4 EpiDREAM and studies from the Candidate Gene Association Resource (CARE)  
5 project including, ARIC (phs000557.v2.p1), CARDIA (phs000613.v1.p2), CHS  
6 (phs000377.v4.p1), the Framingham Cohort (phs000282.v17.p10) and MESA  
7 (phs000283.v7.p3) are presented elsewhere.<sup>29,30</sup> Genotyping was performed  
8 using the gene centric HumanCVD Genotyping BeadChip with 49,320 markers  
9 concentrated in ~ 2,100 loci that are related to metabolism and cardiovascular  
10 disease.<sup>31</sup> This limited scope of analysis was motivated by access to a greater  
11 sample size, as well as the high computational cost of fitting CQR models across  
12 percentiles the sample outcome distribution. Samples with sex-discordance,  
13 array-wide call rate below 95-98%, and/or average heterozygosity beyond 3  
14 standard deviations of the mean heterozygosity, were removed.<sup>32,33</sup> Family  
15 members were defined by identity by descent (IBD) (PI HAT) above 0.5 and  
16 those with lower call rate were removed so that only one member of each family  
17 group was retained for analysis (Table S2). Samples from the COPDGene  
18 (phs000765.v1.p2) study were genotyped using the Illumina HumanHap550 (v3)  
19 genotyping BeadChip (Illumina Inc., San Diego, CA, USA) with 561,466 markers  
20 and QC procedures were performed as above except that cryptic relatedness  
21 was defined by IBD PI HAT > 0.1875.<sup>34,35</sup> Genotypes from the WHI study  
22 (phs000746.v1.p3) and eMERGE II (phs000888.v1.p1) were comprised of an  
23 imputed dataset and samples from related/duplicate participants were removed.

**Abadi, A, et al.** Penetrance of polygenic obesity susceptibility loci across the body mass index distribution: an update on scaling effects.

Analyses of the WHI dataset were conducted on each sub-study (WHIMS, GARNET, HIPFX, MOPMAP and GECCO). A summary of sample QC, along with a complete list of datasets (accession #) and additional details on these studies is provided in Table S2.

**SNP Selection and Marker QC:** SNPs that have previously been associated with BMI, obesity and height were identified by searching the genome-wide association study (GWAS) Catalog, GIANT Consortium data files, and screening the literature.<sup>36-39</sup> Literature screening was conducted independently by A.A. and D.M. to maximize SNP attainment. For GWAS SNPs, only associations with  $p < 5 \times 10^{-08}$  were considered. These SNPs were sorted into correlated linkage disequilibrium blocks (LD,  $R^2 > 0.1$ ) based on genomic sequences from EA populations (Phase 3, 1000 Genome Project) and the strongest association SNP on the HumanCVD Genotyping BeadChip was selected.<sup>31,40</sup> Proxy SNPs (LD,  $R^2 > 0.9$ ) were identified for SNPs in LD blocks not represented on the array. Thus, 39 BMI/obesity- and 129 height-associated SNPs were identified. For studies using different genotyping platforms, the original association SNPs (39 BMI/obesity and 129 height) were screened and proxied as above on each genotyping platform. SNPs that mapped to the same gene were screened jointly using conditional regression analysis to test for independent associations with quantitative traits (BMI or height) and only SNPs that maintained associations were retained.<sup>41</sup> However SNPs in *FTO* (rs1421085 and rs6499653) and *PCSK1* (rs6232 and s6235) were exempted from exclusion due to prior evidence in the literature of independent associations with

**Abadi, A, et al.** Penetrance of polygenic obesity susceptibility loci across the body mass index distribution: an update on scaling effects.

1 BMI/obesity.<sup>42-44</sup> In total, 37 BMI/obesity- and 125 height-associated independent  
2 SNPs were identified and selected for further analysis. SNP call rate, minor allele  
3 frequency (MAF) and exact tests of Hardy-Weinberg equilibrium (HWE) in EA  
4 populations are presented in Tables S3-4. Within each study, SNPs with a call  
5 rate below 90% or HWE  $p$ -value  $< 1 \times 10^{-6}$  were excluded from analysis. In  
6 addition, only SNPs imputed with high quality were retained for analysis ( $R^2 > 0.7$   
7 for WHI and info score  $> 0.7$  for eMERGE II).<sup>45</sup> SNP genotypes were encoded  
8 per the trait increasing effect alleles and modeled additively for individual  
9 analyses.

10 **Gene Scores:** The cumulative gene score (GS) was calculated for all  
11 BMI/obesity- and height-associated SNPs (GS-BMI and GS-Height, respectively).  
12 An un-weighted GS was utilized because weights can be biased and context  
13 dependent.<sup>46,47</sup> No GS was calculated for participants with more than 10%  
14 missing genotypes, otherwise missing SNP genotypes were imputed using the  
15 arithmetic average genotype at each missing SNP. In addition to BMI, *GIPR*  
16 (rs10423928, LD  $R^2=1$  with rs11672660 in EA), *TCF7L2* (rs7903146),  
17 *TOMM40/APOE* (rs2075650), *HMGCR* (rs4604177, LD  $R^2=0.63$  with rs6453133  
18 in EA), *PCSK1* (rs6235), *CDKAL1* (rs9356744) and *KCNQ1* (rs2283228) have  
19 also been associated with several co-morbidities of obesity including glucose  
20 homeostasis, T2D, lipid levels and CRP levels.<sup>48-55</sup> To mitigate potential biases  
21 stemming from these comorbidities at higher BMI percentiles, a GS excluding  
22 these 7 SNPs was also calculated, GS-BMI (Stringent). Finally, GSs for both BMI  
23 and Height were calculated without imputing missing genotypes, GS-BMI (No



**Abadi, A, et al.** Penetrance of polygenic obesity susceptibility loci across the body mass index distribution: an update on scaling effects.

1 Imputation) and GS-Height (No Imputation). Testing GS-BMI (Stringent), GS-BMI  
2 (No Imputation) and GS-Height (No Imputation) was performed as sensitivity  
3 analysis.

4 **Statistical Analysis:** A statistical framework combining CQR and MR was  
5 used to model variation in the effects of SNPs under single and mixture GXE and  
6 GXG interactions (see Supplemental Note).<sup>24,26</sup> Like ordinary least square (OLS),  
7 CQR models may assume a linear relationship and provide intercept and slope  
8 estimates for a series of pre-specified percentiles.<sup>23,24</sup> Therefore, CQR can be  
9 applied to produce a comprehensive evaluation of the effects of a SNP across  
10 the sample distribution of a quantitative trait (e.g. BMI or height). A piecewise  
11 linear plot for the series of CQR estimates at different percentiles provides a  
12 useful visual summary of their variation along the sample distribution.<sup>23,24</sup> Figure  
13 1 shows a working example of CQR and MR in comparison with OLS using *FTO*  
14 (rs1421085) and ARIC CARE.

15 Under conditions where true single and mixed GXE and GXG interactions  
16 are unadjusted, SNPs will shift both the location and scale (variance) of the  
17 sample outcome distribution (see Supplemental Note).<sup>56</sup> These shifts in scale  
18 result in detectable variations of CQR estimates collected from percentiles across  
19 the sample outcome distribution. It follows that CQR estimates for a SNP are  
20 constant (i.e. equal) across percentiles if all unadjusted interaction effects are  
21 zero. It is important to consider that GXG interactions include non-linear genetic  
22 models of effects where the presence of one allele changes the effects of a  
23 second allele within the same variant.<sup>57,58</sup> Thus, the association of SNPs with an

**Abadi, A, et al.** Penetrance of polygenic obesity susceptibility loci across the body mass index distribution: an update on scaling effects.

outcome under unadjusted interactions essentially reduces to modelling variability in CQR estimates. This can be effectively achieved using MR.<sup>25,26</sup> In this context, MR is basically a regression model where the CQR estimates from across the sample outcome distribution represent the dependent variable and the percentiles at which these CQR estimates were calculated represent the independent variable (Figure 1). Additional details on CQR and MR as well as an analytic description of this statistical framework and simulations are presented in the Supplemental Note and Figures S1-2.

OLS models were used to verify the associations of SNPs and GSs with BMI/obesity and height in the sample populations included in this study. CQR models were fitted at every 5<sup>th</sup> percentile of the distribution of BMI and height for each SNP. A total of 10,000 Markov chain marginal bootstrap (MCMB) replicates were used to compute confidence intervals and the cross-percentile variance-covariance matrix for CQR estimates.<sup>59-61</sup> The proportion of the trait variance explained by GS-BMI and GS-Height in CQR models was also calculated.<sup>62</sup> Hypothesis test statistics in MR were computed assuming normality to estimate the effects of percentiles on changes in mean CQR estimates for each SNP. The set of percentiles (5<sup>th</sup> to 95<sup>th</sup>) were re-centered at the 50<sup>th</sup> percentile so that the intercept of the MR models corresponds to the main effect of the SNP at the median. To compute residuals after adjusting for the median effects of each SNP on BMI, the univariable median effect of each SNP was calculated using CQR at the 50<sup>th</sup> percentile and the residuals were calculated by subtracting the product of this median effect and the genotype from BMI. SNP effects on variance were

**Abadi, A, et al.** Penetrance of polygenic obesity susceptibility loci across the body mass index distribution: an update on scaling effects.

estimated using OLS analysis of  $z^2$ .<sup>63</sup> Lastly, the effects of each SNP and the GS on the risk of specific BMI categories (NW vs. OW, NW vs. Ob-I, NW vs. Ob-II and NW vs. Ob-III) was estimated using logistic regression.

All regression models were performed using one-step individual participant-data meta-analysis (also known as 'joint-analysis' or 'mega-analysis').<sup>64,65</sup> This method was justified by access to individual participant data and the fact that CQR analyses refer to the conditional sample distribution.<sup>66</sup> This means that analyses on separate studies correspond to their conditional distributions and it would not be appropriate to combine them using meta-analysis of their summary statistics. All models were adjusted for age (years), sex (female=0, male=1) and study (factor). Age was modeled quadratically (age and age-squared) for BMI analysis, consistent with previous reports.<sup>14,20</sup> Analysis of SNPs and the GS with BMI (37 SNPs+GS=38) and height (125 SNPs+GS=126) were subject to multiple testing correction using Bonferroni adjusted p-value thresholds of  $p < 0.05/38 = 1.32 \times 10^{-3}$  and  $p < 0.05/126 = 3.97 \times 10^{-4}$ , respectively.<sup>67</sup> QC and statistical analyses were conducted using PLINK version 1.90b3.42 and R version 3.3.2.<sup>32,33,68-78</sup> CQR models were fitted using *quantreg* and MR models were fitted using *metafor*.<sup>79,80</sup> Additional packages used in the analysis include *GenABEL*, *pracma*, *doParallel*, *foreach* and *data.table*.<sup>81-85</sup>

**Abadi, A, et al.** Penetrance of polygenic obesity susceptibility loci across the body mass index distribution: an update on scaling effects.

**1 RESULTS:**

2 Figure 1 depicts a step by step analysis of *FTO* (rs1421085) in the ARIC  
3 CARE study. In the top left panel, an OLS model (green) is fitted to determine the  
4 mean effects of *FTO* genotype on BMI ( $\beta_{OLS}$ , kg/m<sup>2</sup> per Effect Allele) and CQR  
5 models (grey) are fitted evenly across the sample BMI distribution (every 5<sup>th</sup>  
6 percentile) to determine the effects of *FTO* genotype at each BMI percentile  
7 ( $\beta_{CQR}$ , kg/m<sup>2</sup> per Effect Allele). In middle right panel, the estimates ( $\beta_{OLS}$  and  
8  $\beta_{CQR}$ ) and 95% confidence intervals from these models are collected and plotted  
9 against the BMI percentile at which they were fitted. In the bottom left panel, MR  
10 analysis (magenta) is used to model variation in the CQR estimates across the  
11 sample BMI distribution and MR estimates ( $\beta_{MR}$ , kg/m<sup>2</sup> per Effect Allele per BMI  
12 percentile) along with 95% confidence intervals are plotted. Presenting the  
13 results of OLS, CQR and MR in this way is useful for summarizing the purpose of  
14 each analysis and contrasting possible differences between them.

15 Initially, OLS models were fitted for each of 37 BMI/obesity-associated  
16 SNPs and all but one was verified to increase BMI in this study sample (Table 1).  
17 CQR models were then fitted at regular intervals of the BMI distribution to explore  
18 whether the effects of SNPs on BMI varied across the sample distribution (Table  
19 S5). CQR estimates for each SNP were plotted against the BMI percentiles at  
20 which they were produced to provide a visual summary of the CQR results  
21 (Figures 2 and S3). Several SNPs had effects that appeared to increase across  
22 the distribution of BMI including, *FTO* (rs1421085), *PCSK1* (rs6235), *TCF7L2*

**Abadi, A, et al.** Penetrance of polygenic obesity susceptibility loci across the body mass index distribution: an update on scaling effects.

1 (rs7903146), *MC4R* (rs11873305), *FANCL* (rs12617233), *GIPR* (rs11672660),  
2 *MAP2K5* (rs997295), *FTO* (rs6499653) and *NT5C2* (rs3824755).

3 Single or mixed interactions in the effects of SNPs that are not adjusted in  
4 regression models will produce variability in CQR estimates along the distribution  
5 of the outcome (see Supplemental Note). This variability can be detected and  
6 quantified using MR.<sup>25,26</sup> Simulations showed that the power to detect such  
7 interactions using CQR and MR was not affected by the MAF or the main effects  
8 of the SNPs, but increased with the number of interactions as well as the main  
9 effects of the interacting covariate (see Supplemental Note and Figure S1).  
10 Yaghootkar, et al., have recently shown that differences in the prevalence of  
11 diseases outcomes (e.g. T2D) between sample and general populations can bias  
12 regression estimates of the main effects of SNPs on risk factors (e.g. BMI).<sup>86</sup>  
13 However, the variability of CQR estimates across the sample distribution is not  
14 affected by biased main effects when CQR models are fitted with adjustment for  
15 disease status (see Supplemental Note). This was supported by simulations  
16 which showed that the prevalence of disease outcomes in sample populations  
17 had negligible effects on the power and Type-I error rate for detecting unadjusted  
18 interactions when CQR models were adjusted for disease status (see  
19 Supplemental Note and Figure S2).

20 MR models were fitted to assess the variability in the CQR estimates of  
21 BMI-associated SNPs along the sample distribution of BMI (Table 2, Figures 2  
22 and S3). Significant positive associations ( $p < 1.32 \times 10^{-03}$ ) between BMI percentile  
23 and CQR estimates were detected for 9 of 37 SNPs (24%) including, *FTO*

**Abadi, A, et al.** Penetrance of polygenic obesity susceptibility loci across the body mass index distribution: an update on scaling effects.

(rs1421085,  $\beta_{MR}$  [95%CI]=0.49 [0.37, 0.62],  $p=8.69 \times 10^{-15}$ ), *PCSK1* (rs6235, 0.32 [0.18, 0.46],  $7.11 \times 10^{-06}$ ), *TCF7L2* (rs7903146, 0.30 [0.17, 0.44],  $9.60 \times 10^{-06}$ ), *MC4R* (rs11873305, 0.60 [0.31, 0.89],  $5.08 \times 10^{-05}$ ), *FANCL* (rs12617233, 0.26 [0.13, 0.39],  $5.30 \times 10^{-05}$ ), *GIPR* (rs11672660, 0.29 [0.14, 0.45],  $1.64 \times 10^{-04}$ ), *MAP2K5* (rs997295, 0.23 [0.10, 0.35],  $3.25 \times 10^{-04}$ ), *FTO* (rs6499653, 0.25 [0.11, 0.40],  $6.23 \times 10^{-04}$ ) and *NT5C2* (rs3824755, 0.36 [0.15, 0.57],  $7.90 \times 10^{-04}$ ). The estimates from MR ( $\beta_{MR}$ ) quantify changes in the impact of each SNP on BMI across the sample distribution. For these 37 SNPs, the median  $\beta_{MR}$  value [Q1, Q3] was 0.135 [0.094, 0.217] kg/m<sup>2</sup> per Effect Allele per BMI Percentile. In this statistical framework  $\beta_{MR}$  is equal to zero if all SNP interaction effects are also zero (see Supplemental Note). Positive  $\beta_{MR}$  estimates indicate that effects of SNPs vary systemically by BMI percentile because unadjusted interactions are inflating the effects of SNPs in participants with high BMI.

Since height is known to be highly heritable, analyses were extended to height as a reference to the BMI results.<sup>22,87,88</sup> OLS models were fitted for each of 125 height-associated SNPs and all but two were verified to increase height (Table S6). CQR and MR were used to estimate variation in the effects of these SNPs on height as above (Figure S4 and Table S7). Only one height-associated SNP, *IGF1* (rs6219,  $\beta_{MR}$  [95%CI]=0.48 [0.23, 0.73],  $p=1.80 \times 10^{-04}$ ), showed significantly ( $p < 3.97 \times 10^{-04}$ ) increased effects along the sample height distribution (Table S8). For height-associated SNPs, the median  $\beta_{MR}$  value [Q1, Q3] was 0.002 [-0.056, 0.085] cm per Effect Allele per Height Percentile. Thus, CQR estimates for height-associated SNPs were predominantly consistent across

**Abadi, A, et al.** Penetrance of polygenic obesity susceptibility loci across the body mass index distribution: an update on scaling effects.

height percentiles and <1% showed evidence of unadjusted interactions, compared to 24% of BMI/obesity-associated SNPs.

BMI/obesity- and height-associated SNPs were combined into gene scores (GS-BMI and GS-Height, respectively) to examine the overall association of these SNPs across the sample distribution. OLS models were used to verify the positive association between GS-BMI and GS-Height with their respective traits (Table 3). CQR models for GS-BMI showed steadily increasing effects with increasing percentiles, while CQR models for GS-Height did not vary across percentiles (Figure 3). MR analysis indicated that percentiles were significantly and positively associated with CQR estimates for GS-BMI ( $\beta_{MR}$  [95%CI]=0.15 [0.13, 0.17],  $7.03 \times 10^{-37}$ ) but not GS-Height (0.01 [-0.01, 0.02], 0.499) (Table 3). At the 10<sup>th</sup> and 90<sup>th</sup> BMI percentiles, each additional effect allele of GS-BMI increased BMI by 0.054 and 0.167 kg/m<sup>2</sup> (3.1-fold increase), respectively; while each additional allele of GS-Height increased height by 0.172 and 0.180, respectively (Table S5 and S7). Thus, in 1.73m tall persons at the 10<sup>th</sup> BMI percentile, carrying 10 additional BMI-increasing alleles was associated with 1.6 kg of extra weight, while at the 90<sup>th</sup> BMI percentile this was associated with 5.0 kg of extra weight. Furthermore, at the 10<sup>th</sup> and 90<sup>th</sup> BMI percentiles, the proportion of trait variance explained by GS-BMI increased (2.7 fold, 0.130% to 0.357%), while that of GS-Height was stable (1.825% to 1.822%) (Tables S5 and S7). These results support the conclusion that the impact of BMI-associated SNPs was larger for individuals with high BMI, which contrasts with the impact of height-associated SNPs which varied little by height.

**Abadi, A, et al.** Penetrance of polygenic obesity susceptibility loci across the body mass index distribution: an update on scaling effects.

Excluding 7 SNPs that have also been associated with comorbidities of obesity from the GS, GS-BMI (Stringent), did not alter the pattern of increasing effects across the sample BMI distribution (Figure S5).<sup>48-55</sup> Moreover, MR analysis indicated that BMI percentile was significantly and positively associated with the CQR estimates for GS-BMI (Stringent) ( $\beta_{MR}$  [95%CI]=0.14 [0.11, 0.16],  $p=2.18 \times 10^{-23}$ ). In addition, CQR models were refitted with adjustment for diabetic status as this was shown to mitigate the effects of possible stratification within the sample population (see Supplemental Note and Figure S2). Of the 9 SNPs whose effects showed significant increases across the sample BMI distribution (Table 2 and Figure 2), 3 have also been associated with glucose homeostasis and T2D, namely *GIPR* (rs11672660), *TCF7L2* (rs7903146) and *PCSK1* (rs6235).<sup>48,50,53</sup> Refitting CQR models with adjustment for diabetic status had little impact on the results from MR analysis of these SNPs or GS-BMI (Table S9). To address the potential effects of scaling, analyses were conducted on 1) transformed BMI and 2) the residuals after adjusting for the median effects of each SNP. The scaling effect refers to potential correlations between mean and variance effects that result from skewness.<sup>63</sup> Transformations counteract scaling by reducing skewness, which may suppress some potentially useful distributional information, while residual analysis addresses scaling directly to preserve distributional information (Figure S6). Despite a reduction in sensitivity, significant associations between log-transformed BMI percentile and CQR estimates were detected for 4 of 9 SNPs including *FTO* (rs1421085), *PCSK1* (rs6235), *TCF7L2* (rs7903146), *FANCL* (rs12617233) and GS-BMI (Table S9). Rank transformation



**Abadi, A, et al.** Penetrance of polygenic obesity susceptibility loci across the body mass index distribution: an update on scaling effects.

of BMI further reduced the overall sensitivity and only *PCSK1* (rs6235) and GS-BMI continued to show significant associations, while most of the remaining SNPs were relegated to nominal levels of significance (Table S9). Analysis of SNP-adjusted BMI residuals detected significant associations between BMI percentile and CQR estimates for all 9 SNPs and GS-BMI (Table S9). Additional sensitivity analysis that included modelling the effects of age linearly or testing fewer percentiles (i.e. every 10<sup>th</sup> percentile from the 5<sup>th</sup> to 95<sup>th</sup> BMI percentiles) also showed no substantial changes to MR results (Table S9). Furthermore, calculating the GS for each trait without imputing missing genotypes did not affect results for GS-BMI and GS-Height (Figure S5). Finally, the results from CQR were compared to those from conventional subgroup analysis. To this end, the effects of genotype on the risk of OW, Ob-I, Ob-II and Ob-III was evaluated separately using logistic regression (Table S10). The odds ratios (ORs) of each SNP for each category were plotted against the BMI percentiles of the corresponding category and CQR estimates were then overlaid on these bar plots. The patterns from logistic regression models across BMI categories were qualitatively consistent with the patterns from CQR models at comparable BMI percentiles (Figure S7).

**Abadi, A, et al.** Penetrance of polygenic obesity susceptibility loci across the body mass index distribution: an update on scaling effects.

1 **DISCUSSION:**

2       The aim of this study was to investigate variations in the impact of 37  
3 BMI/obesity-associated SNPs across the distribution of BMI. We introduced a  
4 method that applies CQR to model the effects of SNPs at different percentiles of  
5 the sample BMI distribution and then estimated variability in these effects using  
6 MR. CQR estimates at different percentiles were shown to be uniform if all  
7 unadjusted SNP interactions are zero (see Supplemental Note). It follows that  
8 SNPs whose CQR estimates vary significantly across the sample BMI distribution  
9 are regulated by such interactions.

10       CQR analysis revealed distinct profiles of associations of BMI/obesity  
11 SNPs across the sample BMI distribution. Several of these SNPs had effects that  
12 increased steadily at higher BMI percentiles while others had uniform effects that  
13 varied little across BMI percentiles (Figures 2 and S3). One other study has used  
14 CQR to explore the relationship between genetic variants and BMI in a modest  
15 sample of adults for *FTO* (rs1558902) and a GS.<sup>89</sup> The patterns reported by that  
16 study are consistent with the results reported here.<sup>89</sup> Two other reports used  
17 CQR to investigate the effects of SNPs on BMI in European children and their  
18 results are also comparable with those here.<sup>90,91</sup> Overall, the high degree of  
19 correspondence between previously reported CQR results with European  
20 children and those from adults presented here emphasizes the robustness of  
21 these findings. Furthermore, the patterns observed using CQR analysis were  
22 compared to those from conventional logistic regression (subgroup analysis) as  
23 Berndt et al., has demonstrated that the genetic architecture of BMI overlaps

**Abadi, A, et al.** Penetrance of polygenic obesity susceptibility loci across the body mass index distribution: an update on scaling effects.

strongly with BMI categories (Table S10).<sup>92</sup> The patterns across BMI categories from logistic regression were largely consistent with those from CQR (Figure S7). CQR overcomes several of the limitations of subgroup analysis as it utilizes the entire sample data to estimate regression parameters on the same scale as the continuous outcome and comparing CQR estimates from different quantiles is relatively intuitive and easy.<sup>23,92</sup>

MR was applied to model changes in the effects of BMI/obesity SNPs across the sample BMI distribution.<sup>25,26</sup> Results from MR showed that BMI percentile was positively and significantly associated with CQR estimates for 9 of 37 SNPs (24%). In addition, nominal associations were also observed for several other SNPs and the median  $\beta_{MR}$  [Q1, Q3] was 0.135 [0.094, 0.217] kg/m<sup>2</sup> per Effect Allele per BMI Percentile (Table 2 and Figure S3). This is supported by the analysis of GS-BMI which also showed significantly increasing effects across the sample BMI distribution (Figure 3 and Table 3). These findings indicate that unadjusted interactions enhanced the effects of BMI-associated SNPs at higher BMI levels. Modelling the effects of age linearly or considering fewer BMI percentiles (every 10<sup>th</sup> rather than every 5<sup>th</sup> percentile) had minimal effects on these results (Table S9). Although CQR does not make any assumptions about the outcome distribution, BMI is often transformed (log and inverse-rank) to accommodate the normality assumption of OLS at the cost of suppressing some distributional information. Transformations disproportionately compress distances between samples to impose symmetry on distributions and some have argued that rank transformation in particular is overly conservative.<sup>63,93,94</sup> Part of the

**Abadi, A, et al.** Penetrance of polygenic obesity susceptibility loci across the body mass index distribution: an update on scaling effects.

novelty of our approach is that CQR and MR leverage precisely this distributional information to extract evidence of gene interactions and we expect transformations that suppress distances between ranked samples to reduce the sensitivity of this method. Despite decreased sensitivity, significant associations between BMI percentile and CQR estimates were detectable with log transformed BMI for 4 of the 9 SNPs and GS-BMI while the rest showed nominal associations (Table S9). Rank-transformation decreased sensitivity even further and only *PCSK1* (rs6235) and GS-BMI had significant detectable associations, while many of the remaining 9 SNPs showed nominal associations.

Scaling refers to the phenomenon where the mean and variance effects of a SNP can be correlated when the outcome distribution is skewed.<sup>63</sup> This is typically addressed using transformations to impose symmetry on the outcome distribution. Although quantile based methods do not rely on the mean and variance they may also be susceptible to scaling effects (Figure S6).<sup>24</sup> To examine the possible role of scaling in CQR and MR without compromising sensitivity, we conducted analyses on the residuals after adjusting for the median effects of each SNP. Residual analysis was shown to effectively mitigate scaling effects by reducing the correlation between SNP main effects and  $\beta_{MR}$  (Figure S6). Significant associations between residual BMI percentile and CQR estimates were detected for all 9 SNPs and GS-BMI, indicating that the associations persisted even after adjusting for SNP main effects (Table S9). These results confirm that scaling effects did not substantially contribute to our findings. Future work aimed at better understanding the phenomenon of scaling would be useful

**Abadi, A, et al.** Penetrance of polygenic obesity susceptibility loci across the body mass index distribution: an update on scaling effects.

for analysis of quantitative traits with asymmetric distributions.

There is evidence that differences in disease prevalence (e.g. T2D) between sample and general populations can result in the stratification of secondary traits (e.g. BMI) that are risk factors for disease.<sup>86</sup> This stratification can compromise regression estimates of the main effects of SNPs on secondary traits and naively adjusting regression models for disease status may not adequately address this.<sup>86</sup> While the main effects of SNPs from disease-adjusted regression models are susceptible to stratification bias, the variation of SNP effects across the sample distribution is not (see Supplemental Note). This is evident in simulations which showed that stratification had little effect on the power and Type-I error rate of MR analysis when CQR models were adjusted for disease status (Figure S2). As *GIPR* (rs11672660), *TCF7L2* (rs7903146) and *PCSK1* (rs6235) have been associated with glucose homeostasis and T2D, CQR models were refitted with adjustment for diabetic status and analyzed using MR.<sup>48,50,53</sup> These SNPs and the GS continued to show significantly increasing effects across the sample BMI distribution with this adjustment, which demonstrated that the results were not an artifact of possible sample stratification (Table S9). Although estimating the variability of disease-adjusted CQR estimates across the sample distribution using MR is robust against stratification bias, future studies aimed at estimating the main effects of SNPs using CQR should implement methods to address this potential source of bias.<sup>95</sup> A total 7 of the 37 obesity predisposing loci that were selected for analysis have also been associated with comorbidities of obesity including glucose homeostasis, T2D,

**Abadi, A, et al.** Penetrance of polygenic obesity susceptibility loci across the body mass index distribution: an update on scaling effects.

lipid levels and CRP levels.<sup>48-55</sup> Excluding these SNPs from the GS did not alter the pattern observed across the sample BMI distribution or affect the results from MR analysis, which suggested that these findings do not stem from the influence of comorbidities at high BMI levels (Figure S5).

Although BMI was the primary focus of this report these analyses were also applied to height. This was important because analysis of height could shed light on the nature of the unadjusted interactions that were detected. BMI is a composite of both height and weight, where height is one of the most heritable complex human traits and weight is strongly influenced by environmental exposures and behavior.<sup>11,96</sup> If unadjusted interactions in the effects of BMI/obesity-associated SNPs are predominantly due to GXG interactions, then it is reasonable to suppose that they would be detected with a similar frequency in other quantitative traits such as height. On the other hand, if GXE interactions predominate then they may be less frequently detected in quantitative traits with a smaller environmental component (i.e. height). CQR models for 125 height-associated SNPs were mostly uniform and exhibited little variability across height percentiles (Figure S4). Only one significant association between height percentiles and CQR estimates for height SNPs was detected by MR and the median  $\beta_{MR}$  [Q1, Q3] was 0.002 [-0.056, 0.085] cm per Effect Allele per Height Percentile (Table S8). Moreover, the effects of GS-Height did not vary along the sample height distribution, which suggests that unadjusted interactions do not impact the genetic architecture of height to same extent that they do for BMI (Table 3 and Figure 3). The simplest explanation for the discrepancy between the

**Abadi, A, et al.** Penetrance of polygenic obesity susceptibility loci across the body mass index distribution: an update on scaling effects.

results for GS-BMI and GS-Height is that the unadjusted interactions detected from GS-BMI are predominantly GXE interactions. It is important to consider that gene interactions described here include variants with non-linear genetic models of effects where the presence of one allele changes the effects of a second allele.<sup>57,58</sup>

GXE interactions for SNPs in the *FTO* gene have been reported for physical activity, food intake, dietary salt, alcohol consumption and sleep duration.<sup>97-100</sup> In addition, the effects of *TCF7L2* (rs12255372) on BMI showed interactions with fat intake in a weight-loss trial.<sup>101</sup> Our analyses also pointed to significant interactions for *FTO* (rs1421085) and *TCF7L2* (rs7903146), but suggested that such interactions may extend to additional BMI/obesity-associated SNPs including *PCSK1* (rs6235), *MC4R* (rs11873305), *FANCL* (rs12617233), *GIPR* (rs11672660), *MAP2K5* (rs997295), *FTO* (rs6499653), *NT5C2* (rs3824755) and GS-BMI. This is entirely consistent with a report showing that the effects of GS-BMI (29 SNPs) was increased by greater exposure to obesogenic environments and another demonstrating interactions between GS-BMI (69 SNPs) and several obesogenic drivers including socio-economic status, TV watching, 'westernized' diets and physical activity.<sup>14,102</sup> These reports also support the argument that the unadjusted interactions detected for BMI SNPs are predominately GXE interactions. Environmental modification of the effects of genetic variants raises the possibility that preventive measures, sustained lifestyle modifications and therapeutic interventions may attenuate some of the genetic elements of BMI. Indeed, the overall effect of

**Abadi, A, et al.** Penetrance of polygenic obesity susceptibility loci across the body mass index distribution: an update on scaling effects.

1 BMI/obesity SNPs is minimal at low BMI levels (Figures 2 and 3). If weight-gain  
2 leads to a genetically driven 'vicious circle', then weight-loss can lead to a  
3 genetically driven 'virtuous circle'. Investigating additional BMI-associated SNPs  
4 using CQR and MR to uncover the full extent of unadjusted interactions in the  
5 architecture of BMI will be the focus of future studies.

6 This study is the largest yet to apply CQR to examine how the effects of  
7 SNPs vary with BMI and establishes quantitative support for hitherto qualitative  
8 descriptions of CQR. The combined utility of CQR and MR presents a  
9 contemporary statistical framework to cue hypotheses on gene interactions,  
10 better define clinical risks associated with genetic profiles and prioritize clinical  
11 targets. Future studies aimed at distinguishing variants whose effects are  
12 modified by unadjusted interactions from those with fixed effects could advance  
13 the field of precision medicine. With the combined application of CQR and MR,  
14 this can now be achieved solely using information contained within the sample  
15 outcome distribution.

16



**Abadi, A, et al.** Penetrance of polygenic obesity susceptibility loci across the body mass index distribution: an update on scaling effects.

**SUPPLEMENTAL DATA:** Supplemental data include one Supplemental Note, six figures and ten tables

**ACKNOWLEDGEMENTS:** We thank Aihua Li for her assistance in database management and Guillaume Pare for his critical review of the manuscript. Sebastien Robiou-du-Pont was supported by the Heart and Stroke Foundation of Ontario. Sonia S. Anand holds the Heart and Stroke Foundation of Ontario Michael G. DeGroote endowed Chair in Population Health and a Canada Research Chair in Ethnicity and Cardiovascular Disease, Hertzal C. Gerstein holds the Aventis PHRI Chair in Diabetes, Salim Yusuf holds the Heart and Stroke Endowed Chair in Cardiovascular Research, and David Meyre holds a Canada Research Chair in Genetics of Obesity. Further acknowledgements are presented in the Supplemental Note.

# **WEB RESOURCES:**

The URLs for databases and software resources described here are:

dbGaP: <https://www.ncbi.nlm.nih.gov/gap>

1000g: <http://www.internationalgenome.org/>

R statistical software: <http://www.r-project.org/>

PLINK: <https://www.cog-genomics.org/plink2/>

GWAS Catalog: <https://www.ebi.ac.uk/gwas/>

**Abadi, A, et al.** Penetrance of polygenic obesity susceptibility loci across the body mass index distribution: an update on scaling effects.

## **REFERENCES:**

1. Wang, Y.C., McPherson, K., Marsh, T., Gortmaker, S.L., and Brown, M. (2011). Health and economic burden of the projected obesity trends in the USA and the UK. *Lancet* *378*, 815–825.
2. Must, A., Spadano, J., Coakley, E.H., Field, A.E., Colditz, G., and Dietz, W.H. (1999). The disease burden associated with overweight and obesity. *Jama* *282*, 1523–1529.
3. Hill, J.O. (1998). Environmental Contributions to the Obesity Epidemic. *Science* *280*, 1371–1374.
4. Misra, A., and Khurana, L. (2008). Obesity and the Metabolic Syndrome in Developing Countries. *Journal of Clinical Endocrinology & Metabolism* *93*, s9–s30.
5. Stunkard, A.J., Harris, J.R., Pedersen, N.L., and McClearn, G.E. (1990). The body-mass index of twins who have been reared apart. *N. Engl. J. Med.* *322*, 1483–1487.
6. Wardle, J., Carnell, S., Haworth, C.M., and Plomin, R. (2008). Evidence for a strong genetic influence on childhood adiposity despite the force of the obesogenic environment. *Am J Clin Nutr* *87*, 398–404.
7. Pigeyre, M., Yazdi, F.T., Kaur, Y., and Meyre, D. (2016). Recent progress in genetics, epigenetics and metagenomics unveils the pathophysiology of human obesity. *Clin Sci* *130*, 943–986.
8. Gilbert-Diamond, D., and Moore, J.H. (2011). Analysis of gene-gene interactions. *Curr Protoc Hum Genet Chapter 1*, Unit1.14.
9. Cordell, H.J. (2009). Detecting gene–gene interactions that underlie human diseases. *Nat Rev Genet* *10*, 392–404.
10. De, R., Verma, S.S., Drenos, F., Holzinger, E.R., Holmes, M.V., Hall, M.A., Crosslin, D.R., Carrell, D.S., Hakonarson, H., Jarvik, G., et al. (2015). Identifying gene-gene interactions that are highly associated with Body Mass Index using Quantitative Multifactor Dimensionality Reduction (QMDR). *BioData Min* *8*, 41.
11. Reddon, H., Guéant, J.-L., and Meyre, D. (2016). The importance of gene-environment interactions in human obesity. *Clin Sci* *130*, 1571–1597.
12. Rokholm, B., Silventoinen, K., Ängquist, L., Skytthe, A., Kyvik, K.O., and Sørensen, T.I.A. (2011). Increased Genetic Variance of BMI with a Higher Prevalence of Obesity. *PLoS ONE* *6*, e20816.

**Abadi, A, et al.** Penetrance of polygenic obesity susceptibility loci across the body mass index distribution: an update on scaling effects.

13. Rokholm, B., Silventoinen, K., Tynelius, P., Gamborg, M., Sørensen, T.I.A., and Rasmussen, F. (2011). Increasing Genetic Variance of Body Mass Index during the Swedish Obesity Epidemic. *PLoS ONE* 6, e27135.
14. Walter, S., Mejía-Guevara, I., Estrada, K., Liu, S.Y., and Glymour, M.M. (2016). Association of a Genetic Risk Score With Body Mass Index Across Different Birth Cohorts. *Jama* 316, 63–69.
15. Kilpeläinen, T.O., Qi, L., Brage, S., Sharp, S.J., Sonestedt, E., Demerath, E., Ahmad, T., Mora, S., Kaakinen, M., Sandholt, C.H., et al. (2011). Physical activity attenuates the influence of FTO variants on obesity risk: a meta-analysis of 218,166 adults and 19,268 children. *PLoS Med* 8, e1001116.
16. Ahmad, T., Lee, I.M., Pare, G., Chasman, D.I., Rose, L., Ridker, P.M., and Mora, S. (2011). Lifestyle Interaction with Fat Mass and Obesity-Associated (FTO) Genotype and Risk of Obesity in Apparently Healthy U.S. Women. *Diabetes Care* 34, 675–680.
17. Ahmad, S., Rukh, G., Varga, T.V., Ali, A., Kurbasic, A., Shungin, D., Ericson, U., Koivula, R.W., Chu, A.Y., Rose, L.M., et al. (2013). Gene × physical activity interactions in obesity: combined analysis of 111,421 individuals of European ancestry. *PLoS Genet* 9, e1003607.
18. Andreasen, C.H., Stender-Petersen, K.L., Mogensen, M.S., Torekov, S.S., Wegner, L., Andersen, G., Nielsen, A.L., Albrechtsen, A., Borch-Johnsen, K., Rasmussen, S.S., et al. (2008). Low physical activity accentuates the effect of the FTO rs9939609 polymorphism on body fat accumulation. *Diabetes* 57, 95–101.
19. Xi, B., Wang, C., Wu, L., Zhang, M., Shen, Y., Zhao, X., Wang, X., and Mi, J. (2011). Influence of physical inactivity on associations between single nucleotide polymorphisms and genetic predisposition to childhood obesity. *American Journal of Epidemiology* 173, 1256–1262.
20. Young, A.I., Wauthier, F., and Donnelly, P. (2016). Multiple novel gene-by-environment interactions modify the effect of FTO variants on body mass index. *Nat Commun* 7, 12724.
21. Demerath, E.W., Choh, A.C., Johnson, W., Curran, J.E., Lee, M., Bellis, C., Dyer, T.D., Czerwinski, S.A., Blangero, J., and Towne, B. (2013). The Positive Association of Obesity Variants with Adulthood Adiposity Strengthens over an 80-Year Period: A Gene-by-Birth Year Interaction. *Hum Hered* 75, 175–185.
22. Robinson, M.R., Hemani, G., Medina-Gomez, C., Mezzavilla, M., Esko, T., Shakhbazov, K., Powell, J.E., Vinkhuyzen, A., Berndt, S.I., Gustafsson, S., et al. (2015). Population genetic differentiation of height and body mass index across

**Abadi, A, et al.** Penetrance of polygenic obesity susceptibility loci across the body mass index distribution: an update on scaling effects.

Europe. *Nat Genet* 47, 1357–1362.

23. Koenker, R., and Hallock, K. (2001). Quantile regression: An introduction. *Journal of Economic Perspectives*.

24. Koenker, R. (2005). *Quantile Regression* (Cambridge University Press).

25. Thompson, S.G., and Higgins, J.P.T. (2002). How should meta-regression analyses be undertaken and interpreted? *Statist. Med.* 21, 1559–1573.

26. Borenstein, M., Hedges, L.V., Higgins, J.P.T., and Rothstein, H.R. (2009). *Meta-Regression*, in *Introduction to Meta-Analysis* (Chichester, UK: John Wiley & Sons, Ltd).

27. American Diabetes Association (2010). Diagnosis and classification of diabetes mellitus. *Diabetes Care* 33 Suppl 1, S62–S69.

28. World Health Organization (2000). Obesity: preventing and managing the global epidemic. Report of a WHO consultation.

29. Anand, S.S., Dagenais, G.R., Mohan, V., Diaz, R., Probstfield, J., Freeman, R., Shaw, J., Lanas, F., Avezum, A., Budaj, A., et al. (2012). Glucose levels are associated with cardiovascular disease and death in an international cohort of normal glycaemic and dysglycaemic men and women: the EpiDREAM cohort study. *Eur J Prev Cardiol* 19, 755–764.

30. Musunuru, K., Lettre, G., Young, T., Farlow, D.N., Pirruccello, J.P., Ejebe, K.G., Keating, B.J., Yang, Q., Chen, M.-H., Lapchyk, N., et al. (2010). Candidate gene association resource (CARE): design, methods, and proof of concept. *Circulation: Cardiovascular Genetics* 3, 267–275.

31. Keating, B.J., Tischfield, S., Murray, S.S., Bhangale, T., Price, T.S., Glessner, J.T., Galver, L., Barrett, J.C., Grant, S.F.A., Farlow, D.N., et al. (2008). Concept, design and implementation of a cardiovascular gene-centric 50 k SNP array for large-scale genomic association studies. *PLoS ONE* 3, e3583.

32. Weale, M.E. (2010). Quality control for genome-wide association studies. *Methods Mol Biol* 628, 341–372.

33. Anderson, C.A., Pettersson, F.H., Clarke, G.M., Cardon, L.R., Morris, A.P., and Zondervan, K.T. (2010). Data quality control in genetic case-control association studies. *Nat Protoc* 5, 1564–1573.

34. Pillai, S.G., Ge, D., Zhu, G., Kong, X., Shianna, K.V., Need, A.C., Feng, S., Hersh, C.P., Bakke, P., Gulsvik, A., et al. (2009). A genome-wide association study in chronic obstructive pulmonary disease (COPD): identification of two

**Abadi, A, et al.** Penetrance of polygenic obesity susceptibility loci across the body mass index distribution: an update on scaling effects.

major susceptibility loci. *PLoS Genet* 5, e1000421.

35. Zhu, G., Warren, L., Aponte, J., Gulsvik, A., Bakke, P., Anderson, W.H., Lomas, D.A., Silverman, E.K., Pillai, S.G., International COPD Genetics Network (ICGN) Investigators (2007). The SERPINE2 gene is associated with chronic obstructive pulmonary disease in two large populations. *Am J Respir Crit Care Med* 176, 167–173.

36. Speliotes, E.K., Willer, C.J., Berndt, S.I., Monda, K.L., Thorleifsson, G., Jackson, A.U., Lango Allen, H., Lindgren, C.M., Luan, J., Mägi, R., et al. (2010). Association analyses of 249,796 individuals reveal 18 new loci associated with body mass index. *Nat Genet* 42, 937–948.

37. Locke, A.E., Kahali, B., Berndt, S.I., Justice, A.E., Pers, T.H., Day, F.R., Powell, C., Vedantam, S., Buchkovich, M.L., Yang, J., et al. (2015). Genetic studies of body mass index yield new insights for obesity biology. *Nature* 518, 197–206.

38. Wood, A.R., Esko, T., Yang, J., Vedantam, S., Pers, T.H., Gustafsson, S., Chu, A.Y., Estrada, K., Luan, J., Kutalik, Z., et al. (2014). Defining the role of common variation in the genomic and biological architecture of adult human height. *Nat Genet* 46, 1173–1186.

39. MacArthur, J., Bowler, E., Cerezo, M., Gil, L., Hall, P., Hastings, E., Junkins, H., McMahon, A., Milano, A., Morales, J., et al. (2017). The new NHGRI-EBI Catalog of published genome-wide association studies (GWAS Catalog). *Nucleic Acids Res* 45, D896–D901.

40. 1000 Genomes Project Consortium, Auton, A., Brooks, L.D., Durbin, R.M., Garrison, E.P., Kang, H.M., Korbel, J.O., Marchini, J.L., McCarthy, S., McVean, G.A., et al. (2015). A global reference for human genetic variation. *Nature* 526, 68–74.

41. Yang, J., Ferreira, T., Morris, A.P., Medland, S.E., Genetic Investigation of ANthropometric Traits (GIANT) Consortium, Mahajan, A., Madden, P.A.F., Heath, A.C., Martin, N.G., Montgomery, G.W., et al. (2012). Conditional and joint multiple-SNP analysis of GWAS summary statistics identifies additional variants influencing complex traits. *Nat Genet* 44, 369–75–S1–3.

42. Benzinou, M., Creemers, J.W.M., Choquet, H., Lobbens, S., Dina, C., Durand, E., Guerardel, A., Boutin, P., Jouret, B., Heude, B., et al. (2008). Common nonsynonymous variants in PCSK1 confer risk of obesity. *Nat Genet* 40, 943–945.

43. Thorleifsson, G., Walters, G.B., Gudbjartsson, D.F., Steinthorsdottir, V., Sulem, P., Helgadottir, A., Styrkarsdottir, U., Gretarsdottir, S., Thorlacius, S.,

**Abadi, A, et al.** Penetrance of polygenic obesity susceptibility loci across the body mass index distribution: an update on scaling effects.

- Jonsdottir, I., et al. (2009). Genome-wide association yields new sequence variants at seven loci that associate with measures of obesity. *Nat Genet* *41*, 18–24.
44. Rivera, M., Cohen-Woods, S., Kapur, K., Breen, G., Ng, M.Y., Butler, A.W., Craddock, N., Gill, M., Korszun, A., Maier, W., et al. (2012). Depressive disorder moderates the effect of the FTO gene on body mass index. *Mol. Psychiatry* *17*, 604–611.
45. Verma, S.S., de Andrade, M., Tromp, G., Kuivaniemi, H., Pugh, E., Namjou-Khales, B., Mukherjee, S., Jarvik, G.P., Kottyan, L.C., Burt, A., et al. (2014). Imputation and quality control steps for combining multiple genome-wide datasets. *Front Genet* *5*, 370.
46. Janssens, A.C.J.W., Moonesinghe, R., Yang, Q., Steyerberg, E.W., van Duijn, C.M., and Khoury, M.J. (2007). The impact of genotype frequencies on the clinical validity of genomic profiling for predicting common chronic diseases. *Genet. Med.* *9*, 528–535.
47. Dudbridge, F. (2013). Power and predictive accuracy of polygenic risk scores. *PLoS Genet* *9*, e1003348.
48. Diabetes Genetics Initiative of Broad Institute of Harvard and MIT, Lund University, and Novartis Institutes of BioMedical Research, Saxena, R., Voight, B.F., Lyssenko, V., Burtt, N.P., de Bakker, P.I.W., Chen, H., Roix, J.J., Kathiresan, S., Hirschhorn, J.N., et al. (2007). Genome-wide association analysis identifies loci for type 2 diabetes and triglyceride levels. *Science* *316*, 1331–1336.
49. Saxena, R., Elbers, C.C., Guo, Y., Peter, I., Gaunt, T.R., Mega, J.L., Lanktree, M.B., Tare, A., Castillo, B.A., Li, Y.R., et al. (2012). Large-scale gene-centric meta-analysis across 39 studies identifies type 2 diabetes loci. *Am J Hum Genet* *90*, 410–425.
50. Sladek, R., Rocheleau, G., Rung, J., Dina, C., Shen, L., Serre, D., Boutin, P., Vincent, D., Belisle, A., Hadjadj, S., et al. (2007). A genome-wide association study identifies novel risk loci for type 2 diabetes. *Nature* *445*, 881–885.
51. Aulchenko, Y.S., Ripatti, S., Lindqvist, I., Boomsma, D., Heid, I.M., Pramstaller, P.P., Penninx, B.W.J.H., Janssens, A.C.J.W., Wilson, J.F., Spector, T., et al. (2009). Loci influencing lipid levels and coronary heart disease risk in 16 European population cohorts. *Nat Genet* *41*, 47–55.
52. Spracklen, C.N., Chen, P., Kim, Y.J., Wang, X., Cai, H., Li, S., Long, J., Wu, Y., Wang, Y.X., Takeuchi, F., et al. (2017). Association analyses of East Asian individuals and trans-ancestry analyses with European individuals reveal new loci associated with cholesterol and triglyceride levels. *Hum Mol Genet* *26*, 1770–



**Abadi, A, et al.** Penetrance of polygenic obesity susceptibility loci across the body mass index distribution: an update on scaling effects.

1784.

53. Strawbridge, R.J., Dupuis, J., Prokopenko, I., and Barker, A. (2011). Genome-wide association identifies nine common variants associated with fasting proinsulin levels and provides new insights into the pathophysiology of type 2 .... Diabetes.

54. Hwang, J.-Y., Sim, X., Wu, Y., Liang, J., Tabara, Y., Hu, C., Hara, K., Tam, C.H.T., Cai, Q., Zhao, Q., et al. (2015). Genome-wide association meta-analysis identifies novel variants associated with fasting plasma glucose in East Asians. *Diabetes* 64, 291–298.

55. Ng, M.C.Y., Shriver, D., Chen, B.H., Li, J., Chen, W.-M., Guo, X., Liu, J., Bielinski, S.J., Yanek, L.R., Nalls, M.A., et al. (2014). Meta-analysis of genome-wide association studies in African Americans provides insights into the genetic architecture of type 2 diabetes. *PLoS Genet* 10, e1004517.

56. Paré, G., Cook, N.R., Ridker, P.M., and Chasman, D.I. (2010). On the use of variance per genotype as a tool to identify quantitative trait interaction effects: a report from the Women's Genome Health Study. *PLoS Genet* 6, e1000981.

57. Biebermann, H., Krude, H., Elsner, A., Chubanov, V., Gudermann, T., and Grüters, A. (2003). Autosomal-dominant mode of inheritance of a melanocortin-4 receptor mutation in a patient with severe early-onset obesity is due to a dominant-negative effect caused by receptor dimerization. *Diabetes* 52, 2984–2988.

58. Blanco, E.H., Ramos-Molina, B., and Lindberg, I. (2015). Revisiting PC1/3 Mutants: Dominant-Negative Effect of Endoplasmic Reticulum-Retained Mutants. *Endocrinology* 156, 3625–3637.

59. He, X., and Hu, F. (2002). Markov chain marginal bootstrap. *Journal of the American Statistical Association* 97, 783–795.

60. Kocherginsky, M., He, X., and Mu, Y. (2005). Practical Confidence Intervals for Regression Quantiles. *Journal of Computational and Graphical Statistics* 14, 41–55.

61. Koenker, R., and Bassett, G., Jr (1982). Robust tests for heteroscedasticity based on regression quantiles. *Econometrica* 50, 43–61.

62. Koenker, R., and Machado, J. (1999). Goodness of fit and related inference processes for quantile regression. *Jasa* 94, 1296–1310.

63. Yang, J., Loos, R.J.F., Powell, J.E., Medland, S.E., Speliotes, E.K., Chasman, D.I., Rose, L.M., Thorleifsson, G., Steinthorsdottir, V., Mägi, R., et al.

**Abadi, A, et al.** Penetrance of polygenic obesity susceptibility loci across the body mass index distribution: an update on scaling effects.

(2012). FTO genotype is associated with phenotypic variability of body mass index. *Nature* **490**, 267–272.

64. Sung, Y.J., Schwander, K., Arnett, D.K., Kardia, S.L.R., Rankinen, T., Bouchard, C., Boerwinkle, E., Hunt, S.C., and Rao, D.C. (2014). An empirical comparison of meta-analysis and mega-analysis of individual participant data for identifying gene-environment interactions. *Genet. Epidemiol.* **38**, 369–378.

65. Riley, R.D., Lambert, P.C., and Abo-Zaid, G. (2010). Meta-analysis of individual participant data: rationale, conduct, and reporting. *Bmj* **340**, c221.

66. Borah, B.J., and Basu, A. (2013). Highlighting differences between conditional and unconditional quantile regression approaches through an application to assess medication adherence. *Health Econ* **22**, 1052–1070.

67. Feise, R.J. (2002). Do multiple outcome measures require p-value adjustment? *BMC Med Res Methodol* **2**, 8.

68. Lanktree, M.B., Guo, Y., Murtaza, M., Glessner, J.T., Bailey, S.D., Onland-Moret, N.C., Lettre, G., Ongen, H., Rajagopalan, R., Johnson, T., et al. (2011). Meta-analysis of Dense Genecentric Association Studies Reveals Common and Uncommon Variants Associated with Height. *Am J Hum Genet* **88**, 6–18.

69. Guo, Y., Lanktree, M.B., Taylor, K.C., Hakonarson, H., Lange, L.A., Keating, B.J., IBC 50K SNP array BMI Consortium, Guo, Y., Lanktree, M.B., Hakonarson, H., et al. (2013). Gene-centric meta-analyses of 108 912 individuals confirm known body mass index loci and reveal three novel signals. *Hum Mol Genet* **22**, 184–201.

70. R Core Team (2014). R: A language and environment for statistical computing. R Foundation for Statistical Computing.

71. Purcell, S., and Chang, C. PLINK v1.90b3.42 64-bit (20 Sep 2016).

72. Chang, C.C., Chow, C.C., Tellier, L.C., Vattikuti, S., Purcell, S.M., and Lee, J.J. (2015). Second-generation PLINK: rising to the challenge of larger and richer datasets. *Gigascience* **4**, 7.

73. Purcell, S., Neale, B., Todd-Brown, K., Thomas, L., Ferreira, M.A.R., Bender, D., Maller, J., Sklar, P., de Bakker, P.I.W., Daly, M.J., et al. (2007). PLINK: A Tool Set for Whole-Genome Association and Population-Based Linkage Analyses. *The American Journal of Human Genetics* **81**, 559–575.

74. Wigginton, J.E., Cutler, D.J., and Abecasis, G.R. (2005). A note on exact tests of Hardy-Weinberg equilibrium. *The American Journal of Human Genetics* **76**, 887–893.



**Abadi, A, et al.** Penetrance of polygenic obesity susceptibility loci across the body mass index distribution: an update on scaling effects.

75. Taliun, D., Gamper, J., and Pattaro, C. (2014). Efficient haplotype block recognition of very long and dense genetic sequences. *BMC Bioinformatics* 15, 10.
76. Yang, J., Lee, S.H., Goddard, M.E., and Visscher, P.M. (2011). GCTA: a tool for genome-wide complex trait analysis. *Am J Hum Genet* 88, 76–82.
77. Graffelman, J., and Moreno, V. (2013). The mid p-value in exact tests for Hardy-Weinberg equilibrium. *Stat Appl Genet Mol Biol* 12, 433–448.
78. Gaunt, T.R., Rodriguez, S., and Day, I.N. (2007). Cubic exact solutions for the estimation of pairwise haplotype frequencies: implications for linkage disequilibrium analyses and a web tool 'CubeX'. *BMC Bioinformatics* 8, 428.
79. Koenker, R. (2013). quantreg: Quantile Regression.
80. Viechtbauer, W. (2010). Conducting meta-analyses in R with the metafor package. *J Stat Softw* 36, 1–48.
81. Borchers, H.W. (2015). pracma: Practical numerical math functions (R package version 1.8.3).
82. Analytics, R., and Weston, S. (2014). doParallel: Foreach parallel adaptor for the parallel package (R package version 1.0.8).
83. Dowle, M., Short, T., and Lianoglou, S. (2014). data.table: Extension of data (R package version 1.9.4).
84. Warnes, G.R., Ben Bolker, Gorjanc, G., Grothendieck, G., Korosec, A., Lumley, T., MacQueen, D., Magnusson, A., Rogers, J., and others (2014). gdata: Various R programming tools for data manipulation. CRAN.R-Project.org.
85. Aulchenko, Y.S., Ripke, S., Isaacs, A., and van Duijn, C.M. (2007). GenABEL: an R library for genome-wide association analysis. *Bioinformatics* 23, 1294–1296.
86. Yaghootkar, H., Bancks, M.P., Jones, S.E., McDaid, A., Beaumont, R., Donnelly, L., Wood, A.R., Campbell, A., Tyrrell, J., Hocking, L.J., et al. (2017). Quantifying the extent to which index event biases influence large genetic association studies. *Hum Mol Genet* 26, 1018–1030.
87. Silventoinen, K., Sammalisto, S., Perola, M., Boomsma, D.I., Cornes, B.K., Davis, C., Dunkel, L., De Lange, M., Harris, J.R., Hjelmborg, J.V.B., et al. (2003). Heritability of adult body height: a comparative study of twin cohorts in eight countries. *Twin Res* 6, 399–408.
88. Hemani, G., Yang, J., Vinkhuyzen, A., Powell, J.E., Willemsen, G., Hottenga,

**Abadi, A, et al.** Penetrance of polygenic obesity susceptibility loci across the body mass index distribution: an update on scaling effects.

J.-J., Abdellaoui, A., Mangino, M., Valdes, A.M., Medland, S.E., et al. (2013). Inference of the Genetic Architecture Underlying BMI and Height with the Use of 20,240 Sibling Pairs. *Am J Hum Genet* 93, 865–875.

89. Williams, P.T. (2012). Quantile-specific penetrance of genes affecting lipoproteins, adiposity and height. *PLoS ONE* 7, e28764.

90. Beyerlein, A., Kries, von, R., Ness, A.R., and Ong, K.K. (2011). Genetic markers of obesity risk: stronger associations with body composition in overweight compared to normal-weight children. *PLoS ONE* 6, e19057.

91. Mitchell, J.A., Hakonarson, H., Rebbeck, T.R., and Grant, S.F.A. (2013). Obesity-susceptibility loci and the tails of the pediatric BMI distribution. *Obesity* 21, 1256–1260.

92. Berndt, S.I., Gustafsson, S., Mägi, R., Ganna, A., Wheeler, E., Feitosa, M.F., Justice, A.E., Monda, K.L., Croteau-Chonka, D.C., Day, F.R., et al. (2013). Genome-wide meta-analysis identifies 11 new loci for anthropometric traits and provides insights into genetic architecture. *Nat Genet* 45, 501–512.

93. Bůžková, P. (2013). Linear regression in genetic association studies. *PLoS ONE* 8, e56976.

94. Beasley, T.M., Erickson, S., and Allison, D.B. (2009). Rank-based inverse normal transformations are increasingly used, but are they merited? *Behav. Genet.* 39, 580–595.

95. Wei, Y., Song, X., Liu, M., and Ionita-Laza, I. (2016). Quantile Regression in the Secondary Analysis of Case–Control Data. *Journal of the American Statistical Association* 111, 344–354.

96. Yang, J., Bakshi, A., Zhu, Z., Hemani, G., Vinkhuyzen, A.A.E., Lee, S.H., Robinson, M.R., Perry, J.R.B., Nolte, I.M., Van Vliet-Ostaptchouk, J.V., et al. (2015). Genetic variance estimation with imputed variants finds negligible missing heritability for human height and body mass index. *Nat Genet* 47, 1114–1120.

97. Reddon, H., Gerstein, H.C., Engert, J.C., Mohan, V., Bosch, J., Desai, D., Bailey, S.D., Diaz, R., Yusuf, S., Anand, S.S., et al. (2016). Physical activity and genetic predisposition to obesity in a multiethnic longitudinal study. *Nat Meth* 6, 18672.

98. Corella, D., Arnett, D.K., Tucker, K.L., Kabagambe, E.K., Tsai, M., Parnell, L.D., Lai, C.-Q., Lee, Y.-C., Warodomwichit, D., Hopkins, P.N., et al. (2011). A high intake of saturated fatty acids strengthens the association between the fat mass and obesity-associated gene and BMI. *J Nutr* 141, 2219–2225.

**Abadi, A, et al.** Penetrance of polygenic obesity susceptibility loci across the body mass index distribution: an update on scaling effects.

99. Lappalainen, T., Lindstrom, J., Paananen, J., Eriksson, J.G., Karhunen, L., Tuomilehto, J., and Uusitupa, M. (2012). Association of the fat mass and obesity-associated (FTO) gene variant (rs9939609) with dietary intake in the Finnish Diabetes Prevention Study. *Br J Nutr* 108, 1859–1865.
100. Qi, Q., Kilpeläinen, T.O., Downer, M.K., Tanaka, T., Smith, C.E., Sluijs, I., Sonestedt, E., Chu, A.Y., Renström, F., Lin, X., et al. (2014). FTO genetic variants, dietary intake and body mass index: insights from 177,330 individuals. *Hum Mol Genet* 23, 6961–6972.
101. Mattei, J., Qi, Q., Hu, F.B., Sacks, F.M., and Qi, L. (2012). TCF7L2 genetic variants modulate the effect of dietary fat intake on changes in body composition during a weight-loss intervention. *Am J Clin Nutr* 96, 1129–1136.
102. Tyrrell, J., Wood, A.R., Ames, R.M., Yaghootkar, H., Beaumont, R.N., Jones, S.E., Tuke, M.A., Ruth, K.S., Freathy, R.M., Davey Smith, G., et al. (2017). Gene-obesogenic environment interactions in the UK Biobank study. *Int J Epidemiol*.

Abadi, A, et al. Penetrance of polygenic obesity susceptibility loci across the body mass index distribution: an update on scaling effects.

**Figure 1: Working example of conditional quantile regression.** BMI ( $\text{kg/m}^2$ ) was plotted against the number of effect alleles of *FTO* (rs1421085) in the ARIC CARE study (top-left). An ordinary least squares (OLS) model of the mean effect of this SNP on BMI was plotted (solid-green line). Conditional quantile regression (CQR) models, fitted every 5<sup>th</sup> percentile of BMI, show the effects of this SNP at these BMI percentiles (solid-grey lines). The slopes ( $\beta_{OLS}$ , horizontal-dashed-green line;  $\beta_{CQR}$ , thick-black line;  $\text{kg/m}^2$  per Effect Allele) from these models were then plotted against BMI percentile at which they were fitted (middle-right). 95% confidence intervals for these estimates are also plotted (OLS, horizontal-dotted-green line; CQR, shaded-grey region). The change in CQR estimates across BMI percentiles was modeled using meta-regression (MR). The MR slope ( $\beta_{MR}$ ,  $\text{kg/m}^2$  per Effect Allele per BMI percentile, thin-magenta line) and the 95% confidence intervals (dotted-magenta lines) were plotted (bottom-left).

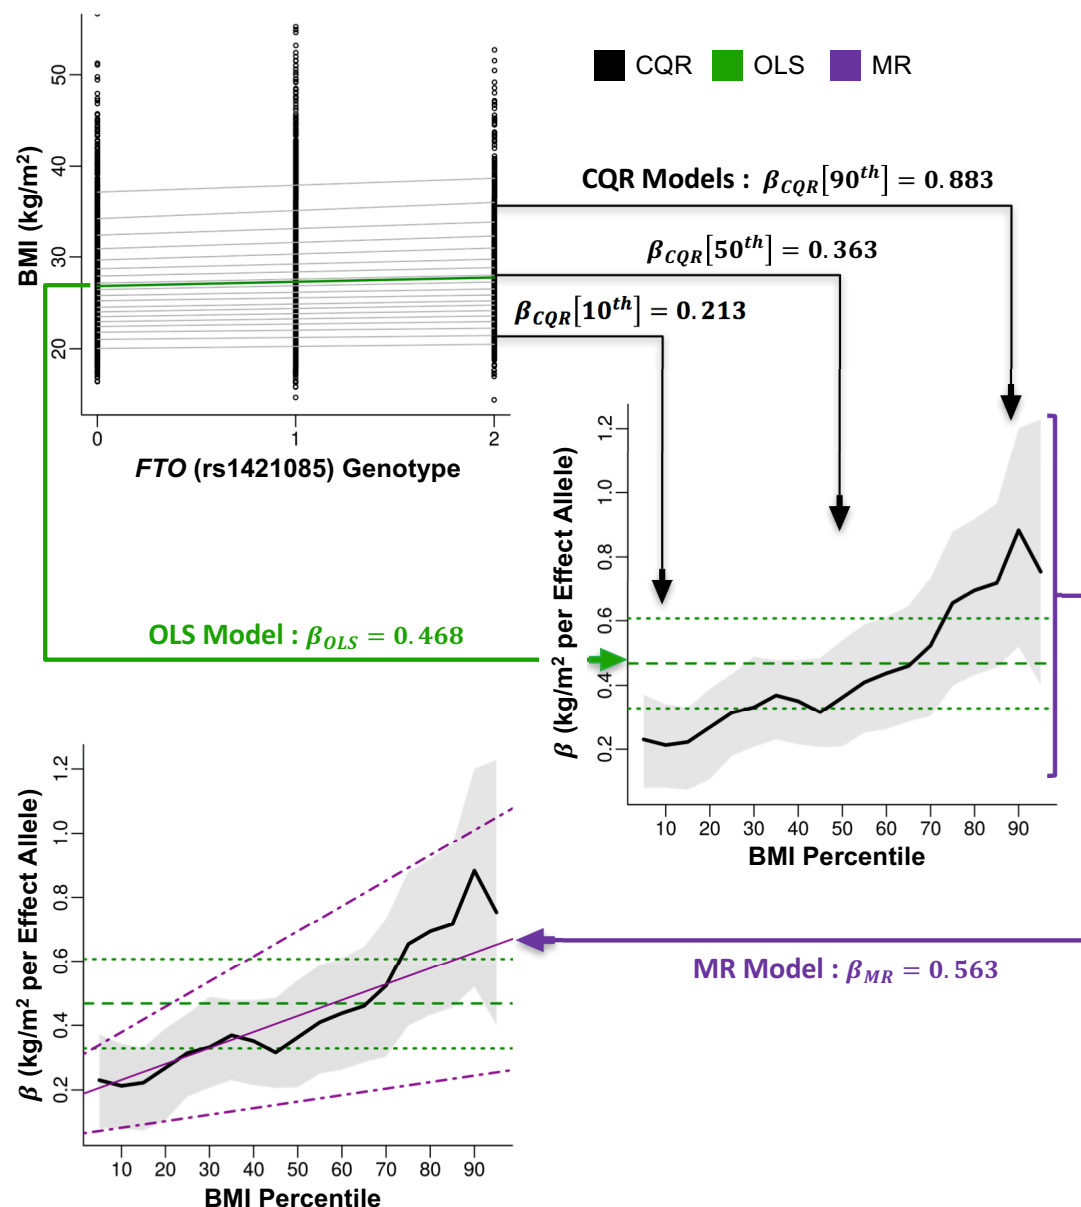

**Abadi, A, et al.** Penetrance of polygenic obesity susceptibility loci across the body mass index distribution: an update on scaling effects.

**Figure 2: The effects of BMI/obesity-associated SNPs across the sample BMI distribution.** Conditional quantile regression (CQR) models of BMI/obesity-associated SNPs were fitted every 5<sup>th</sup> percentile of BMI and adjusted for age, age-squared, sex and study. Estimates of the change in BMI (kg/m<sup>2</sup>) per effect allele ( $\beta_{CQR}$ ) from these models was plotted against the BMI percentile (thick-black line) along with the 95% confidence intervals (shaded-grey region). The results from ordinary least square (OLS) models ( $\beta_{OLS}$ , kg/m<sup>2</sup> per Effect Allele, horizontal-dashed-green line) and the 95% confidence intervals (horizontal-dotted-green lines) were also plotted for comparison. The change in CQR estimates across BMI percentiles was modeled using meta-regression (MR) and estimates from MR ( $\beta_{MR}$ , kg/m<sup>2</sup> per Effect Allele per BMI percentile, thin-magenta line) and the 95% confidence intervals (dotted-magenta lines) were plotted. MR analysis detected significant ( $p < 1.32 \times 10^{-3}$ ) increases in the effects of these SNPs across the sample BMI distribution.

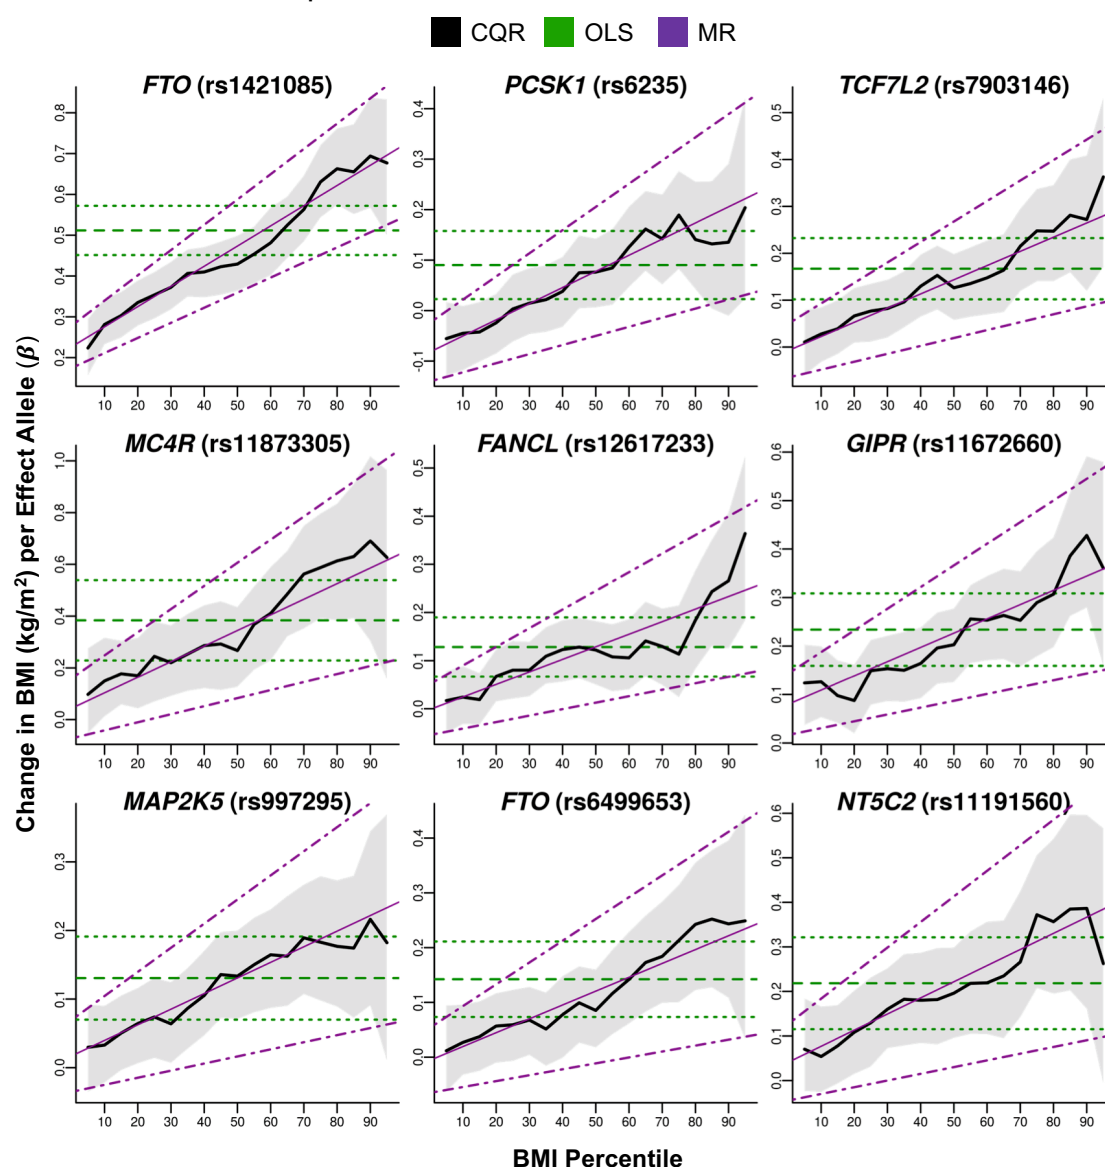

Abadi, A, et al. Penetrance of polygenic obesity susceptibility loci across the body mass index distribution: an update on scaling effects.

**Figure 3: The effects of GS-BMI and GS-Height across the sample distribution of BMI and height, respectively.** As in Figure 2, CQR models of the GS-BMI and GS-Height were plotted against the BMI percentile and height percentile, respectively. The thick-black line is the estimated change in each trait per effect allele (GS-BMI,  $\beta_{CQR}$ , kg/m<sup>2</sup> per Effect Allele; GS-Height,  $\beta_{CQR}$ , cm per Effect Allele) and shaded-grey region represents the 95% confidence intervals. Also plotted are the OLS regression estimates (GS-BMI,  $\beta_{OLS}$  in kg/m<sup>2</sup> per Effect Allele; GS-Height,  $\beta_{OLS}$ , cm per Effect Allele, horizontal-dashed-green line) and 95% confidence intervals (horizontal-dotted-green lines). The change in CQR estimates across outcome percentiles was modeled using meta-regression (MR). Estimates from MR (GS-BMI,  $\beta_{MR}$ , kg/m<sup>2</sup> per Effect Allele per BMI Percentile; GS-Height,  $\beta_{MR}$ , cm per Effect Allele per Height Percentile; thin-magenta line) and the 95% confidence intervals (dotdashed-magenta lines) were also plotted.

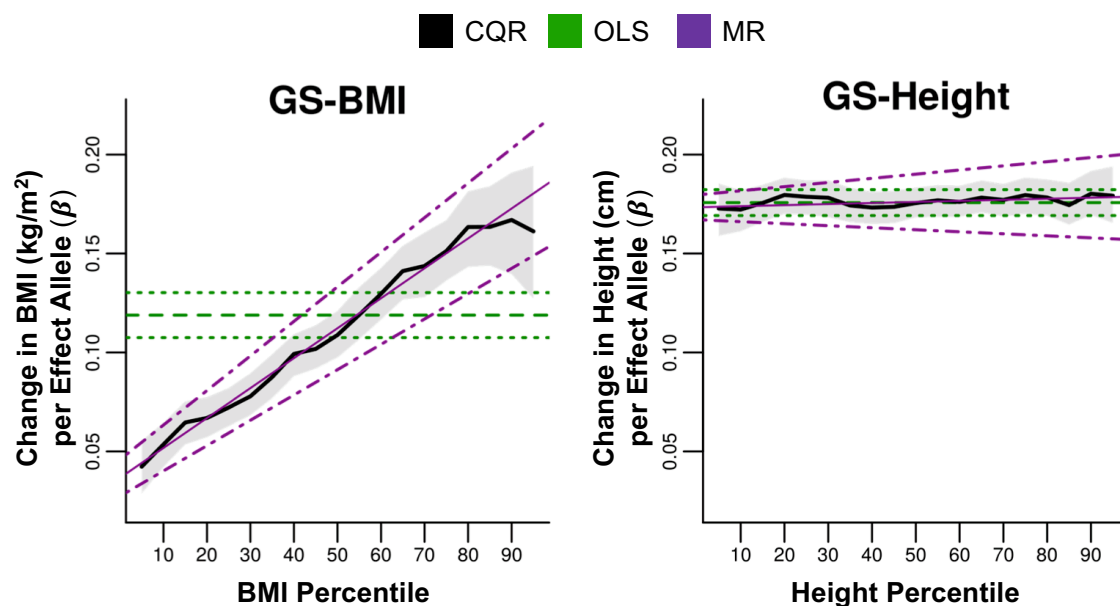



**Abadi, A, et al.** Penetrance of polygenic obesity susceptibility loci across the body mass index distribution: an update on scaling effects.

**Table 1: BMI/Obesity-associated SNP information and results from ordinary least squares (OLS) models.** 37 BMI/obesity predisposing SNPs were selected for analysis. The Effect / Other (E/O) alleles were based on original discovery studies (PMID), and SNPs were coded by BMI increasing or obesity predisposing alleles. Indicated positions were based on GRCh37 and all alleles were on the positive strand. The association of these SNPs with BMI was assessed using OLS models that were adjusted for age, age-squared, sex and study.  $\beta_{OLS}$  is the effect size (kg/m<sup>2</sup> per Effect Allele) and 95%CI are the 95% confidence intervals.

| SNP        | Gene          | Chr:Position | E/O | PMID     | $\beta_{OLS}$ [95%CI] | p-value                |
|------------|---------------|--------------|-----|----------|-----------------------|------------------------|
| rs1421085  | <i>FTO</i>    | 16:53800954  | C/T | 17658951 | 0.512 [0.451, 0.572]  | 5.88x10 <sup>-62</sup> |
| rs10767664 | <i>BDNF</i>   | 11:27725986  | A/T | 20935630 | 0.246 [0.172, 0.319]  | 5.89x10 <sup>-11</sup> |
| rs11672660 | <i>GIPR</i>   | 19:46180184  | C/T | 25673413 | 0.234 [0.159, 0.309]  | 8.16x10 <sup>-10</sup> |
| rs4788099  | <i>SH2B1</i>  | 16:28855727  | G/A | 23001569 | 0.180 [0.113, 0.246]  | 1.13x10 <sup>-07</sup> |
| rs7903146  | <i>TCF7L2</i> | 10:114758349 | C/T | 25673413 | 0.167 [0.102, 0.232]  | 5.36x10 <sup>-07</sup> |
| rs2075650  | <i>TOMM40</i> | 19:45395619  | A/G | 23001569 | 0.218 [0.131, 0.305]  | 9.75x10 <sup>-07</sup> |
| rs11873305 | <i>MC4R</i>   | 18:58049192  | A/C | 25673413 | 0.384 [0.229, 0.539]  | 1.23x10 <sup>-06</sup> |
| rs997295   | <i>MAP2K5</i> | 15:68016343  | T/G | 23001569 | 0.131 [0.070, 0.191]  | 2.40x10 <sup>-05</sup> |
| rs3824755  | <i>NT5C2</i>  | 10:104595849 | C/G | 25673413 | 0.218 [0.115, 0.321]  | 3.32x10 <sup>-05</sup> |
| rs12617233 | <i>FANCL</i>  | 2:59039998   | C/T | 23001569 | 0.128 [0.067, 0.190]  | 4.34x10 <sup>-05</sup> |
| rs6499653  | <i>FTO</i>    | 16:53877592  | T/C | 25673413 | 0.142 [0.073, 0.211]  | 5.19x10 <sup>-05</sup> |
| rs1788826  | <i>NPC1</i>   | 18:21154024  | G/A | 25673413 | 0.124 [0.061, 0.186]  | 1.08x10 <sup>-04</sup> |
| rs17066846 | <i>MC4R</i>   | 18:58044818  | G/T | 25673413 | 0.144 [0.068, 0.220]  | 2.09x10 <sup>-04</sup> |
| rs6453133  | <i>HMGCR</i>  | 5:74692776   | A/G | 25673413 | 0.124 [0.058, 0.189]  | 2.18x10 <sup>-04</sup> |
| rs739564   | <i>IQCK</i>   | 16:19740237  | A/G | 25673413 | 0.147 [0.067, 0.227]  | 2.97x10 <sup>-04</sup> |
| rs2272903  | <i>TFAP2B</i> | 6:50786571   | G/A | 23001569 | 0.173 [0.076, 0.270]  | 4.77x10 <sup>-04</sup> |
| rs7553158  | <i>TNNI3K</i> | 1:75005238   | G/A | 25673413 | 0.102 [0.042, 0.162]  | 8.40x10 <sup>-04</sup> |
| rs11570094 | <i>SPI1</i>   | 11:47359706  | A/C | 25673413 | 0.107 [0.041, 0.172]  | 1.37x10 <sup>-03</sup> |
| rs4946932  | <i>FOXO3</i>  | 6:108974746  | C/A | 25673413 | 0.107 [0.041, 0.174]  | 1.57x10 <sup>-03</sup> |
| rs2819347  | <i>LMOD1</i>  | 1:201884288  | G/C | 25673413 | 0.101 [0.037, 0.165]  | 1.89x10 <sup>-03</sup> |
| rs2836754  | <i>ETS2</i>   | 21:40291740  | C/T | 25673413 | 0.099 [0.033, 0.164]  | 3.20x10 <sup>-03</sup> |
| rs2984618  | <i>TAL1</i>   | 1:47690438   | T/G | 25673413 | 0.087 [0.026, 0.148]  | 5.17x10 <sup>-03</sup> |
| rs11208662 | <i>LEPR</i>   | 1:65987164   | C/G | 23563609 | 0.139 [0.037, 0.242]  | 7.66x10 <sup>-03</sup> |
| rs6235     | <i>PCSK1</i>  | 5:95728898   | G/C | 18604207 | 0.090 [0.023, 0.158]  | 8.82x10 <sup>-03</sup> |
| rs9356744  | <i>CDKAL1</i> | 6:20685486   | T/C | 22344219 | 0.071 [0.005, 0.137]  | 0.035                  |
| rs7988412  | <i>MTIF3</i>  | 13:28000282  | T/C | 25673413 | 0.090 [0.005, 0.175]  | 0.037                  |
| rs1780050  | <i>NEXN</i>   | 1:78400540   | A/C | 25673413 | 0.063 [0.002, 0.124]  | 0.042                  |
| rs526134   | <i>USP37</i>  | 2:219402371  | G/A | 25673413 | 0.066 [0.000, 0.132]  | 0.049                  |
| rs980828   | <i>NOS1AP</i> | 1:162306415  | G/T | 25133637 | 0.050 [-0.010, 0.110] | 0.100                  |
| rs17001561 | <i>SCARB2</i> | 4:77096118   | A/G | 25673413 | 0.070 [-0.017, 0.157] | 0.113                  |

**Abadi, A, et al.** Penetrance of polygenic obesity susceptibility loci across the body mass index distribution: an update on scaling effects.

| <b>SNP</b> | <b>Gene</b>  | <b>Chr:Position</b> | <b>E/O</b> | <b>PMID</b> | <b><math>\beta_{OLS}</math> [95%CI]</b> | <b>p-value</b> |
|------------|--------------|---------------------|------------|-------------|-----------------------------------------|----------------|
| rs6232     | <i>PCSK1</i> | 5:95751785          | C/T        | 18604207    | 0.095 [-0.041, 0.232]                   | 0.172          |
| rs749767   | <i>KAT8</i>  | 16:31124407         | A/G        | 25673413    | 0.042 [-0.022, 0.105]                   | 0.199          |
| rs1211166  | <i>NTRK2</i> | 9:87285992          | A/G        | 23001569    | 0.041 [-0.034, 0.116]                   | 0.289          |
| rs2535633  | <i>ITIH4</i> | 3:52859630          | G/C        | 24861553    | 0.024 [-0.037, 0.085]                   | 0.437          |
| rs10144353 | <i>PRKCH</i> | 14:61911157         | T/C        | 23563609    | 0.044 [-0.067, 0.155]                   | 0.441          |
| rs1561288  | <i>ADCY3</i> | 2:25369002          | C/T        | 23669352    | 0.024 [-0.047, 0.095]                   | 0.507          |
| rs2283228  | <i>KCNQ1</i> | 11:2849530          | C/A        | 24861553    | -0.037 [-0.159, 0.085]                  | 0.550          |



Abadi, A, et al. Penetrance of polygenic obesity susceptibility loci across the body mass index distribution: an update on scaling effects.

**Table 2: Quantifying the effect of BMI percentile on conditional quantile regression (CQR) estimates using meta-regression (MR).** MR was used to model variability in the CQR estimates across BMI percentiles. Note that the percentiles were re-centered around the 50<sup>th</sup> percentile so that the intercept from MR models corresponds to the main effect of the SNP at the median. (\*) Denotes statistical significance at the Bonferroni adjusted threshold of  $p < 1.32 \times 10^{-03}$ ,  $RI_{50}$  is the re-centered intercept of the MR models,  $\beta_{MR}$  is the effect of BMI percentile on CQR estimates (kg/m<sup>2</sup> per Effect Allele per BMI Percentile), 95%CI are the 95% confidence intervals.

| SNP        | Gene          | $RI_{50}$ | $\beta_{MR}$ [95%CI]  | p-value                  |
|------------|---------------|-----------|-----------------------|--------------------------|
| rs1421085  | <i>FTO</i>    | 0.473     | 0.495 [0.370, 0.620]  | $8.69 \times 10^{-15}$ * |
| rs6235     | <i>PCSK1</i>  | 0.078     | 0.320 [0.180, 0.459]  | $7.11 \times 10^{-06}$ * |
| rs7903146  | <i>TCF7L2</i> | 0.144     | 0.303 [0.169, 0.437]  | $9.60 \times 10^{-06}$ * |
| rs11873305 | <i>MC4R</i>   | 0.344     | 0.603 [0.311, 0.895]  | $5.08 \times 10^{-05}$ * |
| rs12617233 | <i>FANCL</i>  | 0.129     | 0.261 [0.134, 0.387]  | $5.30 \times 10^{-05}$ * |
| rs11672660 | <i>GIPR</i>   | 0.227     | 0.294 [0.141, 0.447]  | $1.64 \times 10^{-04}$ * |
| rs997295   | <i>MAP2K5</i> | 0.131     | 0.228 [0.103, 0.352]  | $3.25 \times 10^{-04}$ * |
| rs6499653  | <i>FTO</i>    | 0.121     | 0.253 [0.108, 0.398]  | $6.23 \times 10^{-04}$ * |
| rs3824755  | <i>NT5C2</i>  | 0.222     | 0.362 [0.151, 0.574]  | $7.90 \times 10^{-04}$ * |
| rs7553158  | <i>TNNI3K</i> | 0.099     | 0.196 [0.071, 0.322]  | $2.12 \times 10^{-03}$   |
| rs10767664 | <i>BDNF</i>   | 0.247     | 0.217 [0.064, 0.370]  | $5.50 \times 10^{-03}$   |
| rs4788099  | <i>SH2B1</i>  | 0.151     | 0.194 [0.057, 0.332]  | $5.59 \times 10^{-03}$   |
| rs17066846 | <i>MC4R</i>   | 0.124     | 0.215 [0.063, 0.367]  | $5.61 \times 10^{-03}$   |
| rs9356744  | <i>CDKAL1</i> | 0.063     | 0.186 [0.050, 0.322]  | $7.35 \times 10^{-03}$   |
| rs6453133  | <i>HMGCR</i>  | 0.130     | 0.177 [0.040, 0.314]  | 0.011                    |
| rs2819347  | <i>LMOD1</i>  | 0.111     | 0.137 [0.004, 0.269]  | 0.044                    |
| rs2075650  | <i>TOMM40</i> | 0.283     | 0.161 [-0.019, 0.341] | 0.079                    |
| rs4946932  | <i>FOXO3</i>  | 0.106     | 0.120 [-0.016, 0.256] | 0.084                    |
| rs2984618  | <i>TAL1</i>   | 0.069     | 0.108 [-0.019, 0.235] | 0.095                    |
| rs980828   | <i>NOS1AP</i> | 0.024     | 0.095 [-0.030, 0.220] | 0.135                    |
| rs1788826  | <i>NPC1</i>   | 0.109     | 0.094 [-0.036, 0.224] | 0.156                    |
| rs11570094 | <i>SPI1</i>   | 0.103     | 0.096 [-0.039, 0.231] | 0.163                    |
| rs7988412  | <i>MTIF3</i>  | 0.088     | 0.109 [-0.062, 0.280] | 0.212                    |
| rs2283228  | <i>KCNQ1</i>  | 0.003     | 0.147 [-0.094, 0.388] | 0.232                    |
| rs739564   | <i>IQCK</i>   | 0.122     | 0.100 [-0.065, 0.265] | 0.234                    |
| rs526134   | <i>USP37</i>  | 0.062     | 0.079 [-0.055, 0.212] | 0.247                    |
| rs2272903  | <i>TFAP2B</i> | 0.145     | 0.113 [-0.084, 0.310] | 0.261                    |
| rs2836754  | <i>ETS2</i>   | 0.086     | 0.073 [-0.060, 0.206] | 0.280                    |
| rs2535633  | <i>ITIH4</i>  | 0.016     | 0.068 [-0.059, 0.194] | 0.296                    |
| rs11208662 | <i>LEPR</i>   | 0.142     | 0.111 [-0.105, 0.327] | 0.314                    |

**Abadi, A, et al.** Penetrance of polygenic obesity susceptibility loci across the body mass index distribution: an update on scaling effects.

| <b>SNP</b> | <b>Gene</b>   | <b>RI<sub>50</sub></b> | <b><math>\beta_{MR}</math> [95%CI]</b> | <b>p-value</b> |
|------------|---------------|------------------------|----------------------------------------|----------------|
| rs6232     | <i>PCSK1</i>  | 0.075                  | 0.133 [-0.137, 0.404]                  | 0.334          |
| rs749767   | <i>KAT8</i>   | 0.048                  | 0.058 [-0.075, 0.191]                  | 0.390          |
| rs1561288  | <i>ADCY3</i>  | 0.027                  | -0.037 [-0.185, 0.112]                 | 0.627          |
| rs10144353 | <i>PRKCH</i>  | 0.043                  | 0.049 [-0.171, 0.269]                  | 0.662          |
| rs1211166  | <i>NTRK2</i>  | 0.029                  | -0.027 [-0.179, 0.126]                 | 0.731          |
| rs17001561 | <i>SCARB2</i> | 0.068                  | -0.020 [-0.194, 0.154]                 | 0.824          |
| rs1780050  | <i>NEXN</i>   | 0.045                  | 0.010 [-0.117, 0.136]                  | 0.883          |

**Abadi, A, et al.** Penetrance of polygenic obesity susceptibility loci across the body mass index distribution: an update on scaling effects.

**Table 3: Analysis of the GS-BMI and GS-Height.** BMI/Obesity- and height-associated SNPs were combined into gene scores (GS-BMI and GS-Height, respectively). As in Table 1, the results from ordinary least squares (OLS) models are presented. Furthermore, as in Table 2, meta-regression (MR) analysis was applied to quantify the effects of trait (BMI and height) percentile on the conditional quantile regression (CQR) estimates for GS-BMI and GS-Height, respectively. (\*) Denotes statistical significance at the Bonferroni adjusted threshold of  $p < 1.32 \times 10^{-03}$  for GS-BMI and  $p < 3.97 \times 10^{-04}$  for GS-Height.  $\beta_{OLS}$  is the effect size (GS-BMI,  $\text{kg/m}^2$  per Effect Allele; GS-Height, cm per Effect Allele) from OLS Models,  $RI_{50}$  is the re-centered intercept of the MR models (same units as  $\beta_{OLS}$ ),  $\beta_{MR}$  is the effect size (GS-BMI,  $\text{kg/m}^2$  per Effect Allele per BMI Percentile; GS-Height, cm per Effect Allele per Height Percentile) from MR models, and 95%CI are the 95% confidence intervals.

| SNP       | OLS Models            |                          | MR Models |                       |                          |
|-----------|-----------------------|--------------------------|-----------|-----------------------|--------------------------|
|           | $\beta_{OLS}$ [95%CI] | p-value                  | $RI_{50}$ | $\beta_{MR}$ [95%CI]  | p-value                  |
| GS-BMI    | 0.119 [0.108, 0.130]  | $3.48 \times 10^{-93}$   | 0.112     | 0.151 [0.128, 0.175]  | $7.03 \times 10^{-37}$ * |
| GS-Height | 0.176 [0.169, 0.182]  | $< 2.2 \times 10^{-308}$ | 0.176     | 0.005 [-0.010, 0.021] | 0.499                    |
